# Supplementary material
Source: publisher figshare collection journal article supplement (https://aacr.figshare.com/articles/dataset/_/23641374)
Supplement: Supplementary file 1 [file 41480640]

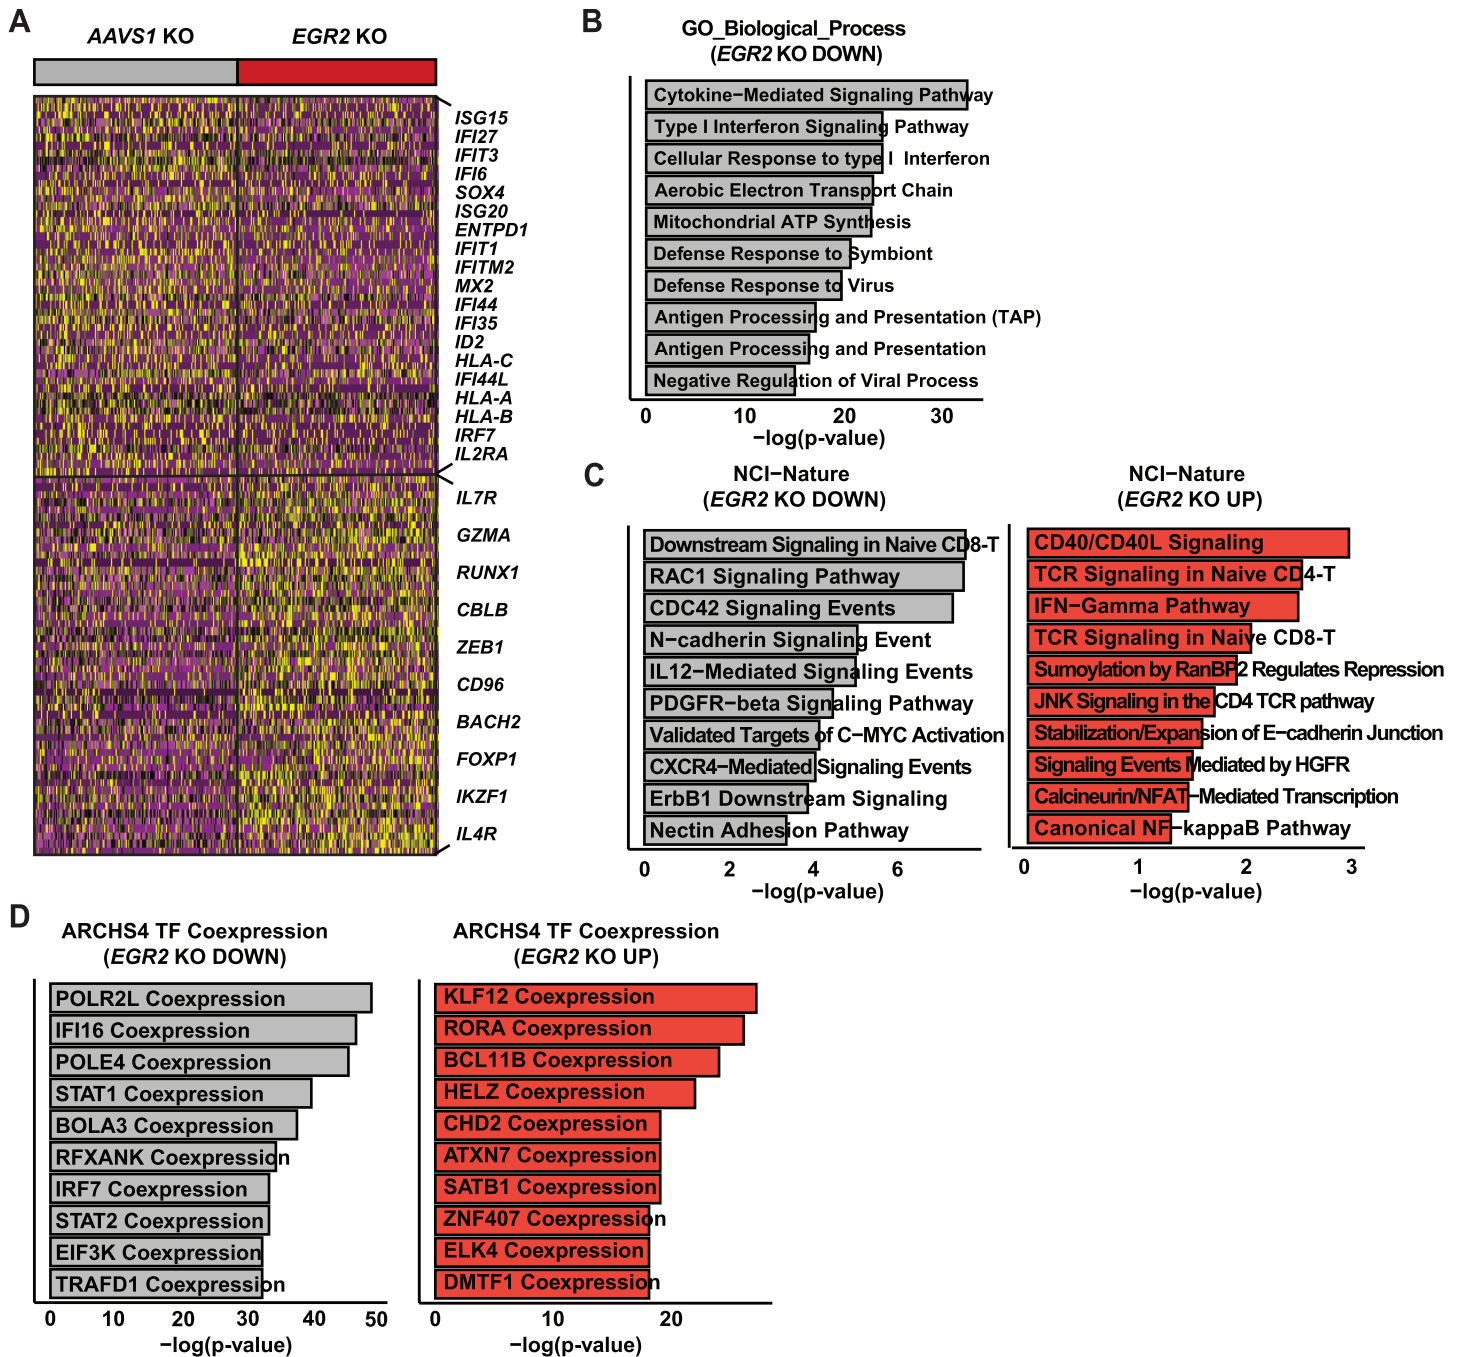

**Supplementary Figure 7. Gene expression and pathway enrichment analysis of CD4<sup>+</sup> T cell clusters.** (A) Heatmap showing differentially expressed genes between *AAVSI* and *EGR2* knockout (KO) CD4<sup>+</sup> T-cells. (B-D) Top differentially regulated pathways in CD4<sup>+</sup> *EGR2* KO compared to *AAVSI* KO CAR T-cells. Pathways were explored using: **B**, GO biological process. **C**, NCI-Nature Pathway Interaction Database 2015. **D**, ARCHS4 transcription factor (TF) co-expression.
